# Supplementary material for: Synthesis, biological and pharmacokinetic characterization of a novel leucine ureido derivative as a multi-target anticancer agent
Source: Royal Society of Chemistry journal article supplement (doi:10.1039/d4ra03200d), 2025-01-01
Supplement: d4ra03200d1.pdf [file d4ra03200d1.pdf]

## Synthesis, biological and pharmacokinetic characterization of novel leucine ureido derivative as multi-target anticancer agent

Fangyuan Shi <sup>a</sup>, Qifu Xu <sup>b</sup>, Yingjie Zhang <sup>\* b</sup>, Jiangying Cao <sup>\* c</sup>, Chunxi Liu <sup>\* a</sup> and Anchang Liu <sup>\* a</sup>

### HPLC analysis of Compound 3

Mobile Phase A: MeOH

Mobile Phase B: water(0.1% formic acid)

Condition: 0-5min, 5%A; 5-65min, 5-95%A; 65-80min, 95%A

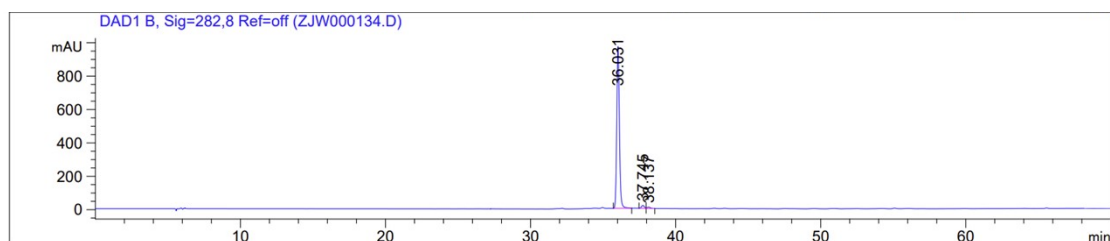

| Peak# | retention time(min) | Peak width (min) | peak areas (mAU*S) | peak heights (mAU) | peak areas(%) |
|-------|---------------------|------------------|--------------------|--------------------|---------------|
| 1     | 36.031              | 0.1924           | 1.21683e4          | 969.73041          | 97.1589       |
| 2     | 37.745              | 0.2137           | 239.21246          | 17.26021           | 1.9100        |
| 3     | 38.137              | 0.3303           | 116.61440          | 8.08467            | 0.9311        |
